# Supplementary material for: TNF-α, IL-6 and hsCRP in patients with melancholic, atypical and anxious depression: an antibody array analysis related to somatic symptoms
Source: PubMed Central journal article supplement — Gen Psychiatr. 2022 Sep 8;35(4):e100844. doi: 10.1136/gpsych-2022-100844 (PMC9462079; doi:10.1136/gpsych-2022-100844), 2022-09-08
Supplement: gpsych-2022-100844supp001.pdf [file gpsych-2022-100844supp001.pdf]

## Supplement Tables

**Supplementary Table 1. Laboratory and statistics results at baseline among groups**

|                                                    | TNF $\alpha$       | IL-6           | hsCRP                |
|----------------------------------------------------|--------------------|----------------|----------------------|
| <b>Healthy controls (HC), Median (IQR) (pg/ml)</b> | 92.9 (51.5-200.8)  | 5.3 (3.2-10.8) | 707.6 (623.8-823.9)  |
| <b>MDD subtypes, Median (IQR) (pg/ml)</b>          |                    |                |                      |
| Melancholic (M)                                    | 199.2 (74.7-615.8) | 9.3 (3.4-18.1) | 725.0 (638.4-848.1)  |
| Atypical (At)                                      | 96.1 (55.8-267.5)  | 5.6 (2.7-14.9) | 830.6 (711.6-905.5)  |
| Anxious (An)                                       | 84.9 (47.6-560.9)  | 6.7 (3.2-21.3) | 840.0 (696.0 -913.8) |
| <b>P-value (adjusted P-value)</b>                  |                    |                |                      |
| Between Groups                                     | 0.528 (0.634)      | 0.937 (0.937)  | <b>0.017</b> (0.059) |
| MDD vs HC                                          | 0.612 (0.735)      | 0.604 (0.765)  | 0.053 (0.170)        |
| M vs HC                                            | 0.241 (0.534)      | 0.526 (0.674)  | 0.674 (0.674)        |
| At vs HC                                           | 0.979 (0.979)      | 0.788 (0.946)  | <b>0.011</b> (0.058) |
| An vs HC                                           | 0.930 (0.930)      | 0.696 (0.835)  | <b>0.042</b> (0.111) |
| M vs At                                            | 0.216 (0.324)      | 0.714 (0.790)  | <b>0.021</b> (0.064) |
| M vs An                                            | 0.241 (0.792)      | 0.792 (0.792)  | 0.080 (0.190)        |
| At vs An                                           | 0.906 (0.908)      | 0.908 (0.908)  | 0.523 (0.908)        |

Note: Median and IQR of inflammatory markers and energy markers were not logarithmically transformed (n TNF $\alpha$  = 153, n hsCRP = 154, n IL-6 = 151), while the *P*-value and adjusted *P*-value of the laboratory results at baseline were obtained from logarithmically transformed. The *P*-value was adjusted by the method of Benjamini - Hochberg. IQR, interquartile range. MDD, major depression disorder. HC, healthy control participants. M, melancholic subtype depression. At, typical subtype depression. An, anxious subtype depression. vs, versus.

**Supplementary Table 2. Laboratory and statistics results at 8-week and 12-week follow-up among groups**

|                                                    | TNF $\alpha$       | IL-6           | hsCRP               |
|----------------------------------------------------|--------------------|----------------|---------------------|
| <b>8-week follow-up, Median (IQR)<br/>(pg/ml)</b>  |                    |                |                     |
| Melancholic (M)                                    | 114.5 (58.5-563.1) | 6.1 (3.4-17.2) | 742.5 (636.9-858.8) |
| Atypical (At)                                      | 104.2 (59.4-284.6) | 5.5 (2.6-15.6) | 767.4 (688.7-893.5) |
| Anxious (An)                                       | 121.4 (48.7-429.5) | 6.9 (3.2-21.0) | 831.0 (687.9-931.3) |
| <b>P-value (adjusted P-value)</b>                  |                    |                |                     |
| Between Groups                                     | 0.735 (0.864)      | 0.985 (0.985)  | 0.397 (0.697)       |
| M vs At                                            | 0.866 (0.866)      | 0.680 (0.794)  | 0.360 (0.608)       |
| M vs An                                            | 0.776 (0.877)      | 0.877 (0.877)  | 0.253 (0.433)       |
| At vs An                                           | 0.674 (0.975)      | 0.789 (0.975)  | 0.903 (0.975)       |
| <b>12-week follow-up, Median (IQR)<br/>(pg/ml)</b> |                    |                |                     |
| Melancholic (M)                                    | 121.3 (53.1-658.1) | 7.0 (3.4-18.1) | 742.5 (638.2-863.9) |
| Atypical (At)                                      | 110.8 (52.3-421.8) | 5.2 (2.6-44.1) | 765.1 (689.0-892.6) |
| Anxious (An)                                       | 109.8 (48.3-373.0) | 6.8 (3.1-20.0) | 837.9 (677.4-938.6) |
| <b>P-value (adjusted P-value)</b>                  |                    |                |                     |
| Between Groups                                     | 0.594 (0.856)      | 0.905 (0.905)  | 0.496 (0.775)       |
| M vs At                                            | 0.837 (0.837)      | 0.632 (0.738)  | 0.437 (0.714)       |
| M vs An                                            | 0.636 (0.742)      | 0.939 (0.939)  | 0.313 (0.528)       |
| At vs An                                           | 0.540 (0.919)      | 0.588 (0.919)  | 0.919 (0.919)       |

Note: Median and IQR of inflammatory markers and energy markers were not logarithmically transformed (n TNF $\alpha$  = 153, n hsCRP = 154, n IL-6 = 151), while the *P*-value and adjusted *P*-value of the laboratory results at baseline were obtained from logarithmically transformed. The *P*-value was adjusted by the method of Benjamini - Hochberg. IQR, interquartile range. M, melancholic. At, atypical. An, anxious. vs, versus.

Supplementary Table 3. Laboratory results and related clinical symptoms between groups at baseline

| Clinical symptoms         |                              | TNF $\alpha$ |           |           |                            |                      |               |
|---------------------------|------------------------------|--------------|-----------|-----------|----------------------------|----------------------|---------------|
|                           |                              | M            | At        | An        | P-value (adjusted P-value) |                      |               |
|                           |                              |              |           |           | M vs At                    | M vs An              | At vs An      |
| Remission                 | Remission at 8-week          | 7.2 (2.0)    | 6.2 (0.8) | 7.3 (1.8) | 0.364 (0.510)              | 0.919 (0.919)        | 0.241 (0.734) |
|                           | without remission at 8-week  | 7.7 (2.2)    | 8.8 (2.4) | 7.1 (1.9) | 0.982 (0.138)              | 0.655 (0.860)        | 0.060 (0.141) |
|                           | Remission at 12-week         | 8.2 (2.1)    | 6.1 (0.9) | 7.4 (1.7) | 0.081 (0.283)              | 0.390 (0.725)        | 0.253 (0.426) |
|                           | without remission at 12-week | 7.3 (2.3)    | 8.2 (2.5) | 6.7 (1.9) | 0.132 (0.177)              | 0.862 (0.862)        | 0.115 (0.252) |
| Pain                      | Without pain                 | 6.7 (1.9)    | 7.2 (2.4) | 7.5 (2.3) | 0.981 (0.981)              | 0.722 (0.733)        | 0.709 (0.931) |
|                           | Moderate or mild pain        | 8.2 (2.4)    | 7.2 (2.4) | 6.8 (2.2) | 0.172 (0.543)              | <b>0.042</b> (0.146) | 0.584 (0.782) |
|                           | Severe pain                  | 7.3 (2.2)    | 6.6 (0.7) | 7.8 (1.9) | 0.602 (0.974)              | 0.686 (0.786)        | 0.398 (0.821) |
| Appetite                  | Without change               | 7.5 (2.0)    | 7.3 (2.4) | 6.7 (2.2) | 0.887 (0.887)              | 0.412 (0.801)        | 0.528 (0.669) |
|                           | Decreased                    | 8.1 (2.3)    | 8.1 (2.3) | 7.4 (2.2) | 0.331 (0.579)              | 0.282 (0.395)        | 0.946 (0.977) |
|                           | Increased                    | 7.4 (2.7)    | 6.6 (2.3) | 6.5 (1.9) | 0.419 (0.932)              | 0.521 (0.967)        | 0.952 (0.998) |
| Gastrointestinal symptoms | Without                      | 7.5 (2.1)    | 7.6 (2.5) | 7.3 (2.5) | 0.915 (0.915)              | 0.886 (0.886)        | 0.809 (0.924) |
|                           | With                         | 8.0 (2.3)    | 7.0 (2.1) | 7.2 (2.2) | 0.170 (0.396)              | 0.238 (0.340)        | 0.795 (0.899) |

Supplementary Table 3 continued.

| IL-6      |           |           |                            |               |                      | hsCRP     |           |           |                            |               |               |
|-----------|-----------|-----------|----------------------------|---------------|----------------------|-----------|-----------|-----------|----------------------------|---------------|---------------|
| M         | At        | An        | P-value (adjusted P-value) |               |                      | M         | At        | An        | P-value (adjusted P-value) |               |               |
|           |           |           | M vs At                    | M vs An       | At vs An             |           |           |           | M vs At                    | M vs An       | At vs An      |
| 2.8 (2.3) | 1.8 (0.9) | 3.3 (1.5) | 0.240 (0.510)              | 0.627 (0.824) | 0.057 (0.400)        | 9.7 (0.3) | 9.5 (0.2) | 9.7 (0.3) | 0.226 (0.510)              | 0.706 (0.824) | 0.317 (0.734) |
| 3.2 (1.7) | 4.7 (2.7) | 2.8 (1.7) | <b>0.018</b> (0.063)       | 0.772 (0.860) | <b>0.016</b> (0.109) | 9.5 (0.3) | 9.7 (0.2) | 9.6 (0.4) | 0.057 (0.099)              | 0.250 (0.860) | 0.389 (0.544) |
| 3.5 (2.2) | 1.5 (1.2) | 3.5 (1.3) | 0.076 (0.283)              | 0.848 (0.848) | 0.089 (0.312)        | 9.6 (0.4) | 9.5 (0.2) | 9.6 (0.3) | 0.470 (0.734)              | 0.827 (0.848) | 0.355 (0.426) |
| 2.9 (1.7) | 4.1 (2.7) | 2.5 (1.7) | 0.069 (0.121)              | 0.837 (0.862) | 0.058 (0.203)        | 9.5 (0.2) | 9.7 (0.2) | 9.6 (0.4) | 0.151 (0.177)              | 0.297 (0.862) | 0.672 (0.672) |

|           |           |           |               |               |               |           |           |           |               |               |                      |
|-----------|-----------|-----------|---------------|---------------|---------------|-----------|-----------|-----------|---------------|---------------|----------------------|
| 2.5 (1.8) | 3.4 (2.4) | 3.3 (1.8) | 0.913 (0.981) | 0.733 (0.733) | 0.824 (0.931) | 9.6 (0.4) | 9.6 (0.2) | 9.7 (0.3) | 0.327 (0.478) | 0.067 (0.136) | 0.419 (0.938)        |
| 3.4 (2.1) | 3.0 (2.3) | 2.8 (1.9) | 0.569 (0.664) | 0.289 (0.404) | 0.670 (0.782) | 9.5 (0.3) | 9.7 (0.3) | 9.6 (0.3) | 0.098 (0.543) | 0.277 (0.398) | 0.584 (0.782)        |
| 3.1 (2.2) | 2.6 (0.6) | 3.5 (1.8) | 0.932 (0.974) | 0.437 (0.764) | 0.419 (0.821) | 9.5 (0.1) | 9.6 (0.2) | 9.2 (0.5) | 0.221 (0.974) | 0.197 (0.764) | <b>0.022</b> (0.155) |
| 2.8 (1.6) | 4.2 (2.1) | 2.7 (2.2) | 0.426 (0.509) | 0.943 (0.943) | 0.388 (0.669) | 9.5 (0.3) | 9.7 (0.2) | 9.5 (0.5) | 0.172 (0.509) | 0.771 (0.899) | 0.274 (0.669)        |
| 3.5 (2.2) | 3.5 (2.2) | 3.2 (1.8) | 0.638 (0.894) | 0.776 (0.776) | 0.818 (0.977) | 9.5 (0.2) | 9.5 (0.2) | 9.6 (0.3) | 0.063 (0.438) | 0.085 (0.227) | 0.679 (0.977)        |
| 3.2 (1.8) | 2.4 (2.3) | 2.5 (1.0) | 0.828 (0.932) | 0.852 (0.967) | 0.998 (0.998) | 9.6 (0.3) | 9.6 (0.2) | 9.6 (0.3) | 0.932 (0.932) | 0.875 (0.967) | 0.769 (0.998)        |
| 2.5 (1.2) | 4.7 (1.9) | 3.2 (2.4) | 0.180 (0.368) | 0.468 (0.616) | 0.550 (0.924) | 9.5 (0.3) | 9.6 (0.2) | 9.7 (0.4) | 0.210 (0.368) | 0.177 (0.319) | 0.924 (0.924)        |
| 3.5 (2.1) | 2.8 (2.1) | 3.0 (1.7) | 0.298 (0.457) | 0.530 (0.618) | 0.653 (0.899) | 9.5 (0.3) | 9.6 (0.2) | 9.6 (0.3) | 0.071 (0.250) | 0.236 (0.340) | 0.653 (0.899)        |

Note: Mean (standard deviation, SD) of inflammatory markers and energy markers were logarithmically transformed (n TNF $\alpha$  = 153, n hsCRP = 154, n IL-6 = 151). The *P*-value was adjusted by the method of Benjamini - Hochberg. M, melancholic; At, atypical; An, anxious.
